# Supplementary material for: Impact of Anxiety Disorders Among Patients with Chronic Illnesses at the University of Abuja Teaching Hospital, Gwagwalada, Abuja, Nigeria
Source: Research Square preprint supplement (doi:10.21203/rs.3.rs-8326949/v1), 2026-01-08
Supplement: Supplementary file 1 [file 72f2a9f2a84893c210059c4c.docx]

**Impact of Anxiety Disorders Among Patients with Chronic Illnesses at the University of Abuja Teaching Hospital, Gwagwalada, Abuja, Nigeria**

**SECTION A: SOCIODEMOGRAPHIC CHARACTERISTICS**

**A1. Age (in completed years):** ________

**A2. Sex:**

1. ☐ Male
2. ☐ Female

**A3. Marital Status:**

1. ☐ Single
2. ☐ Married
3. ☐ Separated
4. ☐ Divorced
5. ☐ Widowed

**A4. Religion:**

1. ☐ Christianity
2. ☐ Islam
3. ☐ Traditional
4. ☐ Others (specify): ___________

**A5. Level of Education Completed:**

1. ☐ No formal education
2. ☐ Primary education
3. ☐ Secondary education
4. ☐ Tertiary education

**A6. Occupation:**

1. ☐ Unemployed
2. ☐ Self-employed
3. ☐ Civil servant
4. ☐ Private sector worker
5. ☐ Retired
6. ☐ Others (specify): ___________

**A7. Monthly Income (₦):**

1. ☐ < ₦30,000
2. ☐ ₦30,000–₦60,000
3. ☐ ₦61,000–₦100,000
4. ☐ ₦101,000–₦200,000
5. ☐ > ₦200,000

**A8. Household Size:** ________

**A9. Duration of Residence in Community:**

1. ☐ <1 year
2. ☐ 1–5 years
3. ☐ >5 years

**SECTION B: CHRONIC ILLNESS PROFILE**

**B1. Do you have any chronic medical condition diagnosed by a doctor?**

1. ☐ Yes
2. ☐ No → (If No, end interview)

**B2. What chronic illness(es) were you diagnosed with? (Check all that apply)**

1. ☐ Hypertension
2. ☐ Diabetes mellitus
3. ☐ Asthma
4. ☐ HIV/AIDS
5. ☐ Chronic kidney disease
6. ☐ Sickle cell disease
7. ☐ Stroke
8. ☐ Cancer
9. ☐ Arthritis
10. ☐ Others (specify): ___________________

**B3. Duration since diagnosis:**

1. ☐ <1 year
2. ☐ 1–5 years
3. ☐ 6–10 years
4. ☐ >10 years

**B4. Are you currently receiving treatment?**

1. ☐ Yes
2. ☐ No

**B5. Type of treatment received (select all):**

1. ☐ Medications
2. ☐ Lifestyle modification
3. ☐ Physiotherapy
4. ☐ Counseling
5. ☐ Herbal/Traditional treatment
6. ☐ Others (specify): ________________

**B6. Treatment adherence (self-reported):**

1. ☐ Very good
2. ☐ Good
3. ☐ Poor
4. ☐ Very poor

**B7. Frequency of Clinic Visits:**

1. ☐ Weekly
2. ☐ Monthly
3. ☐ Every 3 months
4. ☐ Every 6 months
5. ☐ Irregular

**SECTION C: HOSPITAL ANXIETY AND DEPRESSION SCALE – ANXIETY SUBSCALE (HADS-A)**

*(Ask each question exactly as written; circle the response given.)*

**Instruction:** The following statements refer to how you have been feeling in the **past week**. Please indicate the option that best describes your feelings.

Scale:
0 = Not at all
1 = Occasionally
2 = Often
3 = Most of the time

**C1. I feel tense or ‘wound up’:**
☐ 0 ☐ 1 ☐ 2 ☐ 3

**C2. I get a sort of frightened feeling as if something awful is about to happen:**
☐ 0 ☐ 1 ☐ 2 ☐ 3

**C3. Worrying thoughts go through my mind:**
☐ 0 ☐ 1 ☐ 2 ☐ 3

**C4. I can sit at ease and feel relaxed:**
☐ 3 ☐ 2 ☐ 1 ☐ 0 *(reverse scoring)*

**C5. I get a sort of frightened feeling like ‘butterflies’ in the stomach:**
☐ 0 ☐ 1 ☐ 2 ☐ 3

**C6. I feel restless and have to be on the move:**
☐ 0 ☐ 1 ☐ 2 ☐ 3

**C7. I get sudden feelings of panic:**
☐ 0 ☐ 1 ☐ 2 ☐ 3

**Scoring:**
0–7 = Normal
8–10 = Mild anxiety
11–14 = Moderate anxiety
15–21 = Severe anxiety

**SECTION D: RISK FACTORS ASSOCIATED WITH ANXIETY AMONG INDIVIDUALS WITH CHRONIC ILLNESS**

**D1. Do you experience persistent pain related to your illness?**

1. ☐ Yes
2. ☐ No

**D2. Have you been hospitalized in the last 6 months?**

1. ☐ Yes
2. ☐ No

**D3. Do you have any other chronic condition apart from the one stated above?**

1. ☐ Yes
2. ☐ No
   If Yes, specify: ___________________

**D4. How would you describe your level of social support?**

1. ☐ Very good
2. ☐ Good
3. ☐ Poor
4. ☐ Very poor

**D5. Do you feel financially burdened by the cost of managing your illness?**

1. ☐ Yes
2. ☐ No

**D6. Have you missed clinic appointments due to financial, emotional, or logistical challenges?**

1. ☐ Yes
2. ☐ No

**D7. How satisfied are you with the care provided by your healthcare team?**

1. ☐ Very satisfied
2. ☐ Satisfied
3. ☐ Dissatisfied
4. ☐ Very dissatisfied

**D8. In the past month, have you felt overwhelmed by the demands of managing your condition?**

1. ☐ Yes
2. ☐ No

**D9. Do you have a family history of mental health problems (e.g., anxiety, depression)?**

1. ☐ Yes
2. ☐ No

**D10. Do you use alcohol, tobacco, or any recreational drugs? (Check all that apply)**

1. ☐ None
2. ☐ Alcohol
3. ☐ Tobacco
4. ☐ Others: ________________

**D11. Do you have difficulty sleeping at night?**

1. ☐ Yes
2. ☐ No

**D12. How would you rate your general stress level?**

1. ☐ Low
2. ☐ Moderate
3. ☐ High

**SECTION E: FUNCTIONAL, PSYCHOSOCIAL, AND PRODUCTIVITY IMPACT OF ANXIETY**

**Instruction:**
The following questions ask about how **anxiety or excessive worrying** has affected your daily life **in the past four weeks**.

**Response options for all questions:**

1 = Never
2 = Rarely
3 = Sometimes
4 = Often
5 = Usually

**E1. Cognitive Functioning**

1. Difficulty concentrating or making decisions due to anxious thoughts
   ☐ 1 ☐ 2 ☐ 3 ☐ 4 ☐ 5
2. Feeling mentally fatigued because of constant worrying
   ☐ 1 ☐ 2 ☐ 3 ☐ 4 ☐ 5

**E2. Psychosocial Functioning**

1. Difficulty forming or maintaining relationships due to anxiety
   ☐ 1 ☐ 2 ☐ 3 ☐ 4 ☐ 5
2. Avoidance of social interactions because of excessive worrying
   ☐ 1 ☐ 2 ☐ 3 ☐ 4 ☐ 5

**E3. Sleep and Physical Symptoms**

1. Poor sleep quality or insomnia due to anxiety
   ☐ 1 ☐ 2 ☐ 3 ☐ 4 ☐ 5
2. Worsening of physical symptoms of your illness when feeling anxious
   ☐ 1 ☐ 2 ☐ 3 ☐ 4 ☐ 5

**E4. Productivity and Daily Functioning**

1. Reduced productivity at work, school, or household activities due to anxiety
   ☐ 1 ☐ 2 ☐ 3 ☐ 4 ☐ 5
2. Difficulty completing daily tasks because of excessive worrying
   ☐ 1 ☐ 2 ☐ 3 ☐ 4 ☐ 5

**Scoring (For Methods Section)**

- Each item scored **1–5**
- Higher scores indicate **greater functional impact**
